# Pre-Conception Characteristics Predict Obstetrical and Neonatal Outcomes in Women With Polycystic Ovary Syndrome

Jacob P. Christ,<sup>1,2</sup> Marlies N. Gunning,<sup>1</sup> Cindy Meun,<sup>3</sup> Marinus J. C. Eijkemans,<sup>1,4</sup> Bas B. van Rijn,<sup>5</sup> Gouke J. Bonse,<sup>5</sup> Joop S. E. Laven,<sup>3</sup> and Bart C. J. M. Fauser<sup>1</sup>

<sup>1</sup>Department of Reproductive Medicine & Gynecology, University Medical Center Utrecht, 3584 CX Utrecht, Netherlands; <sup>2</sup>Cleveland Clinic Lerner College of Medicine, Cleveland, Ohio 44195; <sup>3</sup>Division of Reproductive Medicine, Department of Obstetrics and Gynaecology, Erasmus University Medical Centre, 3015 GD Rotterdam, Netherlands; <sup>4</sup>Julius Center for Health Sciences and Primary Care, University Medical Center Utrecht, 3584 CX Utrecht, Netherlands; and <sup>5</sup>Department of Obstetrics, University Medical Center Utrecht, 3584 CX Utrecht, Netherlands

**ORCID numbers:** 0000-0002-6250-6942 (J. P. Christ).

**Context:** Women with polycystic ovary syndrome (PCOS) are at increased risk for obstetric and perinatal complications. At present, it is unknown how characteristics of PCOS relate to the likelihood of these complications.

**Objective:** To evaluate which preconception features are associated with obstetric and perinatal disease among infertile women with PCOS.

**Design:** Data from two prospective cohort studies completed from January 2004 until January 2014 were linked to Dutch Perinatal national registry outcomes.

**Setting:** Two Dutch university medical centers.

**Participants:** 2768 women diagnosed with PCOS were included. Participants underwent an extensive standardized preconception screening. Exclusion criteria included: age <18 years or >45 years, language barrier, or failure to meet PCOS criteria.

**Interventions:** None.

**Main Outcome Measures:** Outcome measures were obtained from the Dutch Perinatal national registry and included: preeclampsia, preterm delivery, small for gestational age (SGA), low Apgar score, and any adverse outcome.

**Results:** 1715 (62% of participants) women with PCOS were identified as undergoing a pregnancy with live birth after screening. In fully adjusted models, prepregnancy free androgen index was associated with subsequent preeclampsia [OR (95% CI), 1.1 (1.0 to 1.1)]. Fasting glucose [1.4 (1.2 to 1.7)] and testosterone [1.5 (1.2 to 1.7)] predicted preterm delivery. Fasting insulin [1.003 (1.001 to 1.005)], and testosterone [1.2 (1.1 to 1.4)] predicted any adverse outcome. SGA was only predicted by features nonspecific to PCOS.

**Conclusions:** Primary disease characteristics of PCOS, chiefly hyperandrogenism and impaired glucose tolerance, predict suboptimal obstetric and neonatal outcomes. Increased surveillance during pregnancy should focus on women with PCOS and these features to help mitigate disease risk. (*J Clin Endocrinol Metab* 104: 809–818, 2019)

**P**olycystic ovary syndrome (PCOS) is the most common endocrine disorder in women of childbearing age (1). This heterogeneous syndrome is predominantly characterized by oligo-anovulation, hyperandrogenism, and polycystic ovarian morphology (PCOM) (2, 3). Additionally, women diagnosed with PCOS frequently suffer from metabolic dysfunction and are at increased risk for complications during pregnancy and the perinatal period (4–8).

Increased rates of gestational diabetes mellitus, pregnancy induced hypertension, preeclampsia, caesarean-section delivery, and preterm birth have been reported among pregnant women with PCOS (9–12). Neonates born to women with PCOS more frequently present with small for gestational age (SGA) birth weight, low Apgar score, postpartum admission to a neonatal intensive care unit, and even perinatal death (8, 9, 12–15). Complication data are not unequivocal, as some groups have failed to establish increased risk for preeclampsia (15), caesarean-section (10, 16), preterm delivery (16), and SGA (9, 12) among women with this syndrome. Variations between studies may be due to the limited sample size of individual studies and to the heterogeneity of included women with PCOS (17).

In the general population it is postulated that maternal features affect both obstetric and perinatal complication rates. Maternal health and risk behaviors determine the intrauterine environment, which in turn influences a child's future wellbeing and development (18, 19). Among women with PCOS, primary disease characteristics (*i.e.*, hyperandrogenism, menstrual irregularities, and insulin resistance) likely modify this group's risk of maternal and perinatal complications. The few studies available that have attempted to assess disease risk among these women suggest that variability in diagnostic criteria for PCOS, as well as some markers of metabolic dysfunction, may alter risk of adverse pregnancy and neonatal outcomes (15, 17, 20–23). Data between studies are conflicting, however, and there is a paucity of reports comprehensively evaluating the unique risk factors for obstetric and perinatal complications among women with PCOS.

This paper aims to identify the subgroup of women diagnosed with PCOS who are at greatest risk for obstetric and/or neonatal disease. We use two large data resources of 2768 prospectively phenotyped women diagnosed with PCOS before conception and the Dutch Perinatal national registry (24). These results may allow for the stratification of women with PCOS into either normal or high risk categories. In turn these findings may improve allocation of resources, monitoring strategies, and treatment burden.

## Materials and Methods

### Study design

A secondary analysis of two large prospective cohort studies, referred to as the cycle disturbances, oligo-amenorrhea and amenorrhea (COLA) screening (25) on menstrual cycle disturbances, as well as the complications of polycystic ovary syndrome pregnancy: evaluating risk (COPPER) (20) trial was completed. The COLA study recruited women with menstrual cycle irregularities and extensively evaluated relevant endocrine, metabolic, and phenotypic characteristics associated with subjects' menstrual disturbances. The COPPER trial prospectively evaluated pregnancy and perinatal outcomes among women with a diagnosis of PCOS. Women involved in the current analysis were recruited at the University Medical Center, Utrecht and Erasmus Medical Center, Rotterdam from 1 January 2004 to 1 January 2014. An extensive standardized screening was performed for all women as previously described (20, 26). PCOS was assigned according to the 2003 Rotterdam consensus criteria following standardized phenotyping (2, 3). Women were excluded in case of age <18 years or >45 years, language barrier, or failure to meet PCOS criteria.

Data obtained from the COLA and COPPER trials were subsequently linked to the Dutch Perinatal registry (Perined) by the Dutch Central Bureau of Statistics (CBS). The Perined registry consists of population-based data on ~96% of all deliveries and pregnancies carried to greater than 16 completed weeks of gestation in the Netherlands, as previously published (24). Data regarding spontaneous or terminated abortions were not included as the CBS only includes data on live births. Caregivers routinely record maternal, neonatal, and delivery characteristics using electronic registration forms. All data received by the national registry office are validated. If inconsistencies are noted, the data are returned to the caregivers for correction. Data were available from January 1995 to December 2016 at the time of linkage. Both data from our group and the Perined were uploaded to the Dutch CBS, whereby each person receives a unique, yet anonymous, identification code. Highly accurate coding is accomplished through the use of multiple identifiers unique to each subject. Data from our groups and from the Perined were then linked via these unique identification codes. The described linkage procedure is only possible under special conditions, after obtained permission from the Dutch CBS, which guarantees no legal privacy infringements are made to the interest of the patients/citizens. A validation of the Perined data set was possible through comparison of selected (coinciding) obstetric and perinatal data collected both in the COPPER trial, as research data, and in Perined records, through standard abstraction routinely collected in the Netherlands.

Study procedures were conducted with approval of the local institutional ethical review boards (IRB number 17-062). The ethics committee of the Perined and CBS approved the described linkage and subsequent use of the data. COLA and COPPER studies were registered on [www.clinicaltrials.gov](http://www.clinicaltrials.gov) with trial numbers NCT02309047 and NCT00821379, respectively. All trial participants provided written informed consent.

### Clinical assessments

All participants recruited from the outpatient infertility unit and diagnosed with PCOS underwent a standardized baseline screening. This included a lifestyle questionnaire with

socio-economic status, mental state, medical history, and family history of cardiovascular disease (CVD) and/or type 2 diabetes mellitus. Anthropometric measurements included height, weight, waist and hip circumference, as well as blood pressure (BP). Transvaginal ultrasound scans of the uterus and ovaries were completed and assessed for antral follicle count and ovarian volume. Metabolic and endocrine measurements were performed and analyzed in each center separately as previously outlined (27). To account for differences in assays across years of the study and between centers, previously reported conversion factors were used to standardize all laboratory measurements as necessary (25).

The 2003 Rotterdam criterion (2, 3) were assigned as follows: hyperandrogenism-free androgen index (FAI)  $\geq 4.5$  or Ferriman-Gallwey score of  $\geq 9$  (26), PCOM-  $\geq 12$  follicles per ovary or an ovarian volume  $\geq 10$  mL, oligo/anovulation-menstrual cycles  $\geq 35$  days.

Women enrolled in the COPPER study had additional follow-up antenatal visits 10 times from gestational age 6 to 8 weeks until 40 to 42 weeks of pregnancy. Maternal BP, body weight, and venous blood draws were completed at each visit. At 6 to 8 weeks' gestation, a transvaginal ultrasound examination was performed to detect fetal heart activity and measure crown-rump length. Crown-rump length was used to determine gestational age. A medical doctor collected pregnancy outcome data after delivery.

## Study outcomes

All preconception data were obtained through the prospective COLA and COPPER cohort studies. Obstetric and neonatal outcomes of enrolled women with PCOS were obtained from the Perined database after database linkage. Primary outcome analyses were restricted to the first pregnancy after baseline screening. For the sole purpose of assessing the validity of outcomes in the Perined data set, data from a subset of women prospectively evaluated as part of the COPPER trial were compared with data provided by the Perined database. Occasionally data from second or greater pregnancies after screening were used for validity assessment alone.

Obstetric complications obtained from the Perined database included preeclampsia and duration of gestation. Development of preeclampsia is recorded in the Perined database through two methods. Either a woman may be coded as having developed preeclampsia or BP and presence or absence of proteinuria after 20 weeks' gestation may be recorded. If a woman either was coded as having preeclampsia or had a recorded diastolic BP of 90 or more as well as proteinuria, she was considered as having developed preeclampsia for analyses. This procedure is standard for Perined data. Dutch obstetric guidelines have adopted the definition of preeclampsia proposed by the International Society for the Study of Hypertension in Pregnancy defined as BP  $>140$  mm Hg and proteinuria  $>300$  mg/24 hours in the second half of pregnancy (28). Gestational age at delivery was also classified into preterm ( $<37.0$  weeks), term (37.0 to 41.9 weeks), and post term ( $\geq 42.0$  weeks).

Neonatal data obtained from the Perined included birth weight, 5-minute Apgar score, and gender. Birth weight percentiles were calculated for each child based on Dutch population normative curves using the gender, gestational age, parity of the mother, and birth weight of the child (29). Children were also classified as SGA (birth weight percentile  $<10\%$ ) and large for gestational age (birth weight percentile  $>10\%$ ). Apgar

scores were classified as "low Apgar score" if 5-minute Apgar scores were  $<7$ .

A composite variable of any adverse outcome (preeclampsia, preterm delivery, SGA, and/or low Apgar score) was also calculated such that the development of any complication was coded as having an adverse outcome and the lack of development of any complication was coded as not having an adverse outcome.

## Statistical analysis

For all variables of interest 89% of values were complete. Data were missing at random. Missing baseline values were imputed by conditional multiple imputation with 10 iterations and 5 imputations through predictive mean matching.

Baseline characteristics were compared between groups using  $\chi^2$  or Fisher's exact tests for categorical variables. In accordance with CBS protocol to protect individual citizen's privacy, groups with 10 or fewer participants are shown as  $n < 10$ .

To assess the accuracy of the linked Perined database, obstetric and neonatal outcomes recorded prospectively during the COPPER trial were compared with outcomes recorded in the Perined database. Kappa agreement statistics were calculated for categorical variables and intraclass correlation coefficients were calculated for continuous variables. In cases of discrepancy between the COPPER and Perined data sets, data provided by the Perined were used as per CBS protocol prohibiting auditing of individual participant data and to maintain homogeneity across outcomes in the data set.

To assess the relationship between preconception characteristics and obstetric and neonatal complications, first, each potential relevant baseline characteristic was entered into separate regression analyses with obstetric and neonatal outcomes as dependent variables. Univariate logistic regression analyses were used for binary obstetric outcomes. For outcomes utilizing offspring data, generalized estimating equations (GEEs) analysis was used, which controlled for correlations between siblings from multiple gestation pregnancies. Secondly, those baseline characteristics that were found to associate with outcomes of interest in regression analyses at the  $P < 0.1$  level were then entered into multivariable logistic regression models, as well as multivariable GEE models, using a backward elimination technique with a threshold of  $P < 0.1$  for inclusion in the final model. ORs were calculated for variables retained within the final models. ORs were expressed as an increase in odds for every 1-unit increase in continuous variables.

Multiple gestation pregnancies were accounted for in two ways: (i) for two-sample nonadjusted comparisons, women with multiple gestation pregnancies were excluded to eliminate the effects of multiple gestations on outcomes of interest; (ii) for multivariable adjusted regression analyses presence or absence of a multiple-gestation pregnancy was included as a dependent variable for each participant and included in final multivariable models if found to associate with the outcome of interest at the  $P < 0.1$  level.

Multiple testing was controlled for using the Holm-Bonferroni correction method, whereby tests are ranked in order of ascending significance level and adjusted  $\alpha$  levels, below which a test is considered significant, is calculated based on each test's rank and the number of overall tests. This was completed for two sample comparisons, such that  $P$  values were only considered significant if less than the adjusted  $\alpha$  level (30). In the exploratory context of finding candidate predictive

factors, we refrained from Bonferroni adjustments for simple logistic regression and GEE analyses. Thus, two sample comparisons were adjusted for a total of 12 tests.

All data were analyzed using IBM SPSS Statistics (version 20.0; IBM SPSS, Inc., Chicago, IL).

## Results

### Linkage results

In total, 2768 women with PCOS were screened at University Medical Center Utrecht and Erasmus University Medical Centre Rotterdam over the 10-year inclusion period. Linkage to the CBS national database was successful for 97% of these women. Data on 4,235,994 pregnancies from 1995 to 2016 were uploaded from the Perined. Excluding cases of miscarriage, 98% of uploaded pregnancies were accurately identified and linked to the CBS national database. After linkage of the Perined data set to the Copper/COLA data set a total of 1715 (62% of the total number of women with PCOS screened during that time period) women were identified as having a pregnancy after screening that resulted in live birth and were thus included in the analyses. Seventy (4%) women had multiple gestation pregnancies, resulting in a total of 1786 offspring included in the final analyses (Table 1).

Utilizing intraclass correlation ( $r$ ) and Kappa ( $\kappa$ ) statistics for continuous and categorical variables, respectively, concordance between data recorded in the COPPER trial and reported by the Perined was  $\kappa = 0.920$  for pre-eclampsia,  $r = 0.997$  for birth weight, and  $r = 0.940$  for 5-minute Apgar score. A threshold of  $\kappa$  or  $r > 0.9$  was used to represent a high level of agreement.

### Baseline characteristics

Of the 1715 women included, the average age at screening was 28.7 years; 1432 (84%) women were Caucasian, 506 (30%) women had a history of a previous pregnancy, and 363 (21%) women had a history of a previous delivery. Ninety-eight percent of included women had oligo-anovulation, 95% had PCOM, and 50% had hyperandrogenism (Table 1). Among recorded obstetric outcomes, 64 women (4%) were recorded as developing preeclampsia. One hundred seventy-four women (10%) delivered preterm, whereas 12 (1%) women delivered post term. Offspring were born at an average gestational age of (mean  $\pm$  SD)  $39.1 \pm 2.4$  weeks, with an average birth weight of  $3268.0 \pm 666.0$  g and an average birth weight percentile of  $51\% \pm 28\%$ . One hundred fifty-one (9%) offspring were SGA. One hundred seventy-two (10%) offspring were LGA. Average 5-minute Apgar was  $9.4 \pm$

**Table 1. Baseline Characteristics of 1715 Enrolled Infertile Women Diagnosed With PCOS With a Recorded Pregnancy Following Initial Diagnosis (%)**

| Patient History                    |                | Diagnostic Criteria       |                |
|------------------------------------|----------------|---------------------------|----------------|
| Age, y                             | 28.7 $\pm$ 4.3 | Oligo-amenorrhea          | 1675 (98)      |
| Ethnicity                          |                | PCOM                      | 1584 (95)      |
| Caucasian                          | 1432 (84)      | Hyperandrogenism          | 854 (50)       |
| Black                              | 94 (5)         |                           |                |
| Asian                              | 125 (7)        | Endocrine evaluations     |                |
| Other                              | 64 (4)         | Ferriman-Gallwey Score    | 3.7 $\pm$ 5.0  |
| First degree family history of DM  | 142 (9)        | FAI                       | 5.3 $\pm$ 4.4  |
| First degree family history of CVD | 1423 (92)      | SHBG, nmol/L              | 48 $\pm$ 27    |
| Gravidity                          |                | AD, nmol/L                | 6.0 $\pm$ 2.6  |
| 0                                  | 1191 (70)      | Testosterone, nmol/L      | 1.9 $\pm$ 0.9  |
| 1                                  | 312 (18)       | DHEAS, umol/L             | 4.8 $\pm$ 2.4  |
| 2                                  | 124 (7)        | Estrogen, pmol/L          | 222 $\pm$ 197  |
| 3 or more                          | 70 (4)         | FSH, U/L                  | 6.1 $\pm$ 2.3  |
| Parity                             |                | LH, U/L                   | 10.6 $\pm$ 9.4 |
| 0                                  | 1352 (79)      | Metabolic evaluations     |                |
| 1                                  | 287 (17)       | BMI, kg/m <sup>2</sup>    | 26.2 $\pm$ 6.1 |
| 2                                  | 60 (4)         | WHR                       | 0.8 $\pm$ 0.1  |
| 3 or more                          | 16 (1)         | Systolic BP, mm Hg        | 119 $\pm$ 13   |
| Cigarettes/d                       | 2.0 $\pm$ 4.9  | Diastolic BP, mm Hg       | 76 $\pm$ 10    |
| Current smoker                     | 296 (21)       | Glucose, mmol/L           | 4.8 $\pm$ 0.8  |
| Current alcohol use                | 530 (44)       | Insulin, pmol/L           | 60 $\pm$ 56    |
| Drinks/wk                          | 1.5 $\pm$ 2.8  | LDL-C, mmol/L             | 2.9 $\pm$ 1.2  |
|                                    |                | HDL-C, mmol/L             | 1.5 $\pm$ 0.4  |
|                                    |                | Triglycerides, mmol/L     | 1.0 $\pm$ 0.8  |
|                                    |                | Total cholesterol, mmol/L | 4.8 $\pm$ 1.0  |

Variables given as mean  $\pm$  SD for continuous variables or number (percent) for categorical variables.

Abbreviations: AD, androstenedione; DM, diabetes mellitus; HDL-C, high-density lipoprotein cholesterol; LDL-C, low-density lipoprotein cholesterol.

1.1 and 52 (3%) children had an Apgar score below 7 (low Apgar) (Table 2).

Frequency of obstetric and perinatal outcomes among women with and without baseline diagnostic criteria for PCOS

Comparing women with and without the individual 2003 Rotterdam diagnostic criterion (2, 3) for PCOS, women with hyperandrogenism had a significantly higher frequency of preeclampsia (5% vs 2%,  $P = 0.003$ ) and preterm deliveries (11% vs 7%,  $P = 0.004$ ) than women without hyperandrogenism. No significant differences were seen between women with and without oligo-amenorrhea or PCOM across all outcomes (significance was determined after Holm-Bonferroni correction for multiple comparisons) (Fig. 1).

Prediction of adverse outcomes

The main outcomes of interest were (i) preeclampsia, (ii) preterm delivery, (iii) SGA, (iv) low Apgar score, and (v) a composite variable of any of the four obstetric or perinatal adverse outcomes analyzed. Factors to include in final multivariable regression analyses were selected using separate GEEs controlling for twin siblings for outcomes using offspring data and separate logistic regression analyses for maternal outcomes. A threshold of  $P < 0.1$  was used for inclusion. The following outcomes were predicted by the corresponding baseline features and included in final multivariable models: preeclampsia was predicted by non-Caucasian ethnicity, family history

of CVD, presence of a multiple gestation pregnancy, smoking status, FAI, body mass index (BMI), diastolic BP, fasting insulin, and total cholesterol; preterm delivery was predicted by non-Caucasian ethnicity, presence of a multiple gestation pregnancy, smoking status, testosterone, dehydroepiandrosterone sulfate (DHEAS), estrogen, diastolic BP, and fasting glucose; SGA was predicted by age, non-Caucasian ethnicity, parity, presence of a multiple gestation pregnancy, smoking status, BMI, and fasting glucose; low Apgar was predicted by presence of a multiple gestation pregnancy, drinks/week, oligo-anovulation, FAI, waist-to-hip ratio (WHR), fasting insulin, and low-density lipoprotein cholesterol; any adverse outcome was predicted by age, non-Caucasian ethnicity, presence of a multiple gestation pregnancy, smoking status, testosterone, DHEAS, WHR, diastolic BP, and fasting insulin.

These factors were then entered into separate multivariable regression analyses. A backward elimination technique with a threshold of  $P < 0.1$  was used to develop the final prediction models. All baseline features meeting this predefined threshold in the final iteration of the models are presented in Fig. 2. Preeclampsia was independently predicted by presence of a multiple gestation pregnancy [OR (95% CI); 2.9 (1.2 to 7.3),  $P = 0.020$ ], FAI [1.1 (1.0 to 1.1),  $P = 0.020$ ], and diastolic BP [1.1 (1.0 to 1.1),  $P < 0.001$ ] [Fig. 2(A)]. Preterm delivery was independently predicted by presence of a multiple gestation pregnancy [13.2 (7.8 to 22.2),  $P < 0.001$ ], Caucasian ethnicity [0.6 (0.4 to 0.9),  $P = 0.023$ ], testosterone [1.5 (1.2 to 1.7),  $P = 0.001$ ], estrogen [1.001 (1.000 to 1.002),  $P = 0.007$ ], and fasting glucose [1.4 (1.2 to 1.7),  $P = 0.001$ ] [Fig. 2(B)]. SGA was independently predicted by Caucasian ethnicity [0.3 (0.3 to 0.6),  $P < 0.001$ ], smoking status [2.0 (1.3 to 2.9),  $P < 0.001$ ], and BMI [0.96 (0.92 to 0.99),  $P = 0.011$ ] [Fig. 2(C)]. Low Apgar score was independently predicted by presence of a multiple gestation pregnancy [2.6 (1.3 to 5.4),  $P = 0.008$ ] and oligo-amenorrhea [0.2 (0.1 to 0.4),  $P < 0.001$ ] [Fig. 2(D)]. Finally, any adverse outcome was independently predicted by presence of a multiple gestation pregnancy [5.9 (3.6 to 9.8),  $P < 0.001$ ], Caucasian ethnicity [0.5 (0.4 to 0.7),  $P < 0.001$ ], smoking status [1.7 (1.2 to 2.3),  $P = 0.002$ ], testosterone [1.2 (1.1 to 1.4),  $P = 0.002$ ], and fasting insulin [1.003 (1.001 to 1.005),  $P = 0.013$ ] [Fig. 2(E)].

Discussion

A large cohort of 2768 prospectively phenotyped infertile women diagnosed with PCOS before conception was linked with the national Dutch Perinatal registry, including a total of 1715 pregnancies and 1786 offspring.

Table 2. Maternal and Offspring Outcomes of 1715 Infertile Women Diagnosed With PCOS With Recorded Pregnancy After Screening (%)

| Maternal Outcomes (n = 1715)  |            |
|-------------------------------|------------|
| Multiple gestation pregnancy  | 70 (4)     |
| Preeclampsia                  | 64 (4)     |
| Delivery term                 |            |
| Preterm                       | 174 (10)   |
| Term                          | 1522 (88)  |
| Postterm                      | 12 (1)     |
| Gestational age, wk           | 39.1 ± 2.4 |
| Offspring Outcomes (n = 1786) |            |
| Gender                        |            |
| Male                          | 932 (52)   |
| Female                        | 850 (48)   |
| Birth weight, g               | 3268 ± 666 |
| Birth weight percentile, %    | 51 ± 28    |
| SGA                           | 151 (9)    |
| LGA                           | 172 (10)   |
| 5-min Apgar                   | 9.4 ± 1.1  |
| Low Apgar                     | 52 (3)     |

Variables given as mean ± SD for continuous variables or number (percent) for categorical variables.  
Abbreviations: DM, diabetes mellitus; LGA, large for gestational age.

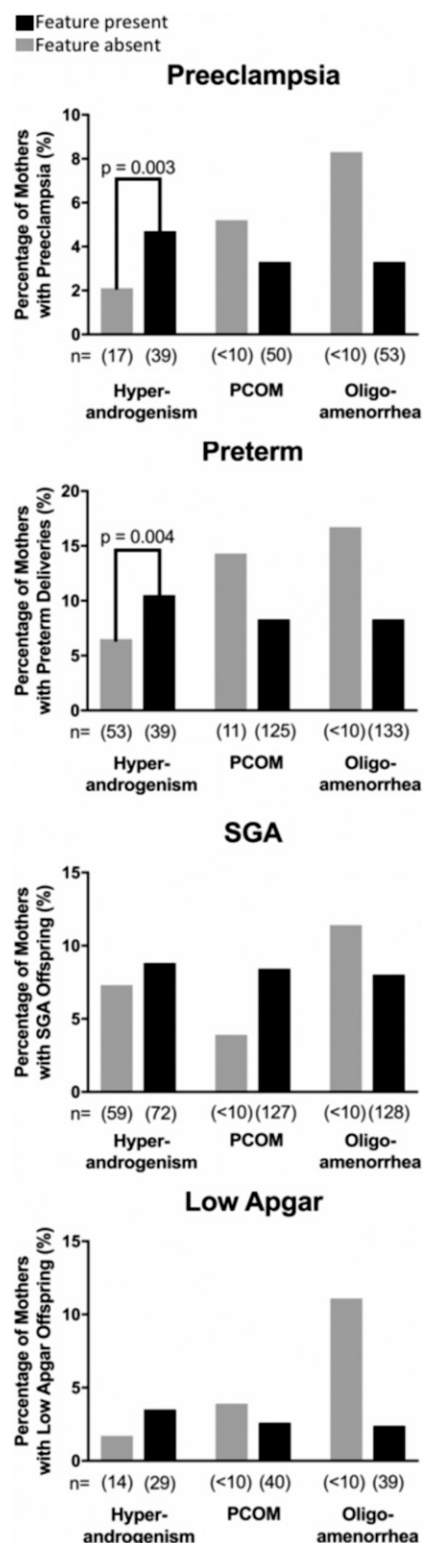

**Figure 1.** Percentage of women with PCOS (total  $n = 1645$ ) and singleton pregnancies that developed obstetric and perinatal complications compared among women with and without individual 2003 Rotterdam diagnostic criterion for PCOS (2, 3). Comparisons are made among the main diagnostic criterion for PCOS. Analyses include women with single gestation pregnancies only.  $P$  values determined by  $\chi^2$  tests or Fisher's exact tests.  $P$  values are listed for significant comparisons after Holm-Bonferroni correction. The following definitions were used for baseline features: Hyperandrogenism =  $\text{FAI} \geq 4.5$  or a Ferriman-Gallwey score of  $\geq 9$ ; PCOM =  $\geq 12$  follicles

The current study provides convincing evidence that preconception hyperandrogenism and impaired glucose tolerance, among women with PCOS, predict multiple obstetric and perinatal complications believed to affect both maternal wellbeing and the future health of offspring.

In the present cohort of women with PCOS, androgen levels independently predicted development of preeclampsia, preterm deliveries, and any adverse obstetric or perinatal outcome. Previous reports have observed comparable results among women with single gestation pregnancies (15, 23) and utilizing either nonadjusted analyses (23) or minimally adjusted models controlling for PCOS nonspecific features such as age, BMI, and parity (15). The current study has observed these results in fully adjusted models controlling for an extensive array of potentially confounding features, such as markers of metabolic and CVD, while including women with multiple gestation pregnancies (31–33) and controlling for this factor in multivariable modeling. Furthermore, unlike previous studies, the current results were found within a large population of women with PCOS. This suggests women with PCOS and hyperandrogenism are at increased risk of obstetric and perinatal disease compared not only to non-PCOS women, but also to women with PCOS without hyperandrogenism.

Hyperandrogenism may have a direct role in disease development. Androgens may contribute to abnormal placental morphology (34), alterations in early trophoblast invasion and placentation, and altered cervical remodeling and myometrial function (35–38). Risk of disease may also be partially due to the link between hyperandrogenism and more severe metabolic dysfunction, including obesity and insulin resistance, among women with PCOS (6, 25). The present results, however, were observed after controlling for any relevant baseline marker of cardio-metabolic disease available thus suggesting an independent effect of androgens on disease risk. Overall, it appears that, prior to pregnancy, hyperandrogenism is a potential indicator of increased likelihood of obstetric and perinatal disease among women with PCOS.

Few have evaluated the possible influence of metabolic dysfunction on obstetric and perinatal complications in women with PCOS. The current data indicate that fasting glucose concentrations before conception predict preterm delivery and fasting insulin is associated with the

**Figure 1. (Continued).** per ovary or an ovarian volume  $\geq 10$  mL. Black bars represent presence of a feature and gray bars indicate absence of a feature. Groups with less than 10 people are indicated by " $n < 10$ " to protect individual citizen's privacy per Dutch CBS protocol.

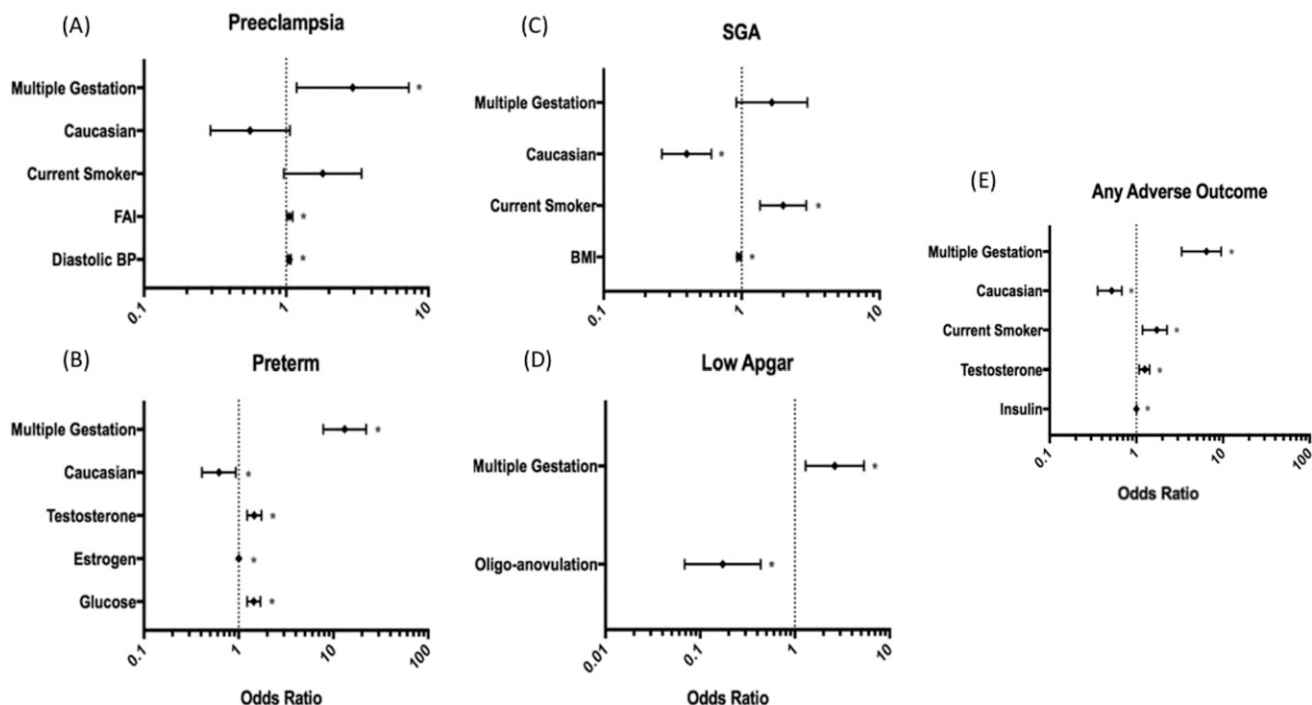

**Figure 2.** Odds of developing perinatal and obstetric complications among 1715 infertile women diagnosed with PCOS. ORs are presented for all factors retained in the final multivariable logistic regression models for (A) preeclampsia and (B) preterm delivery and final multivariable GEE models for (C) SGA, (D) low Apgar, and (E) any adverse outcome. A  $P$  value threshold of  $P < 0.1$  was used to determine which factors were retained in each model and in turn presented in this figure. Each model controls for the presented factors as well as other features that did not meet the threshold for inclusion in the final model, but predicted each outcome in separate baseline analyses at the  $P < 0.1$  level including: family history of CVD, BMI, fasting insulin, and total cholesterol for preeclampsia; smoking status, dehydroepiandrosterone-sulfate, and diastolic BP for preterm delivery; age, parity, and fasting glucose for SGA; drinks/wk, FAI, WHR, insulin, and low density lipoprotein cholesterol for low Apgar score; age, oligo-anovulation, WHR, diastolic BP, and dehydroepiandrosterone-sulfate for any adverse outcome. ORs using continuous variables are given for a 1-unit increase. Significant ORs are indicated with an asterisk ( $P < 0.05$ ).

odds of any adverse outcome in multivariable analyses. Impaired glucose regulation is associated with endothelial dysfunction, inflammation, and may exacerbate adverse effects of hyperandrogenism, which may explain the observed relationship with these outcomes (39, 40). Thus, increased fasting glucose and insulin prior to pregnancy may be linked to worsening hyperandrogenism and predict obstetric disease among women with PCOS.

Although key features of PCOS are associated with obstetrical complications, SGA was only predicted by factors well known to affect pregnancy outcomes in the general population including a multiple gestation pregnancy, ethnicity, smoking, and BMI (41). Previous reports are conflicting with regards to risk of SGA among PCOS women (8). The prevalence of SGA in the Netherlands as of 2013 is 6.3%, lower than that of the reported 9% in the current data set (42). The present findings, however, may suggest that this increased rate is mainly secondary to modifiable risk factors such as BMI and smoking as well as demographic information such as ethnicity.

The presented study has several strengths. The current data analysis represents the largest systematic evaluation

of prepregnancy features in PCOS linked to obstetric and perinatal outcomes as registered nationally. Previous studies of this kind have included less than 500 participants with PCOS (15, 17, 21–23, 26, 43, 44). Utilizing a national database also circumvented issues such as lost to follow-up, often faced in other prospective cohort studies. Data collected from multiple centers in the Netherlands and across several years were included, improving generalizability of the results. Additionally, after initial screening, all women were included regardless of method of conception [spontaneous, ovulation induction—the anticipated vast majority (45), or in-vitro fertilization] increasing applicability of results across treatment strategies. Women were extensively phenotyped in a standardized fashion and the reliability of outcome variables obtained from the Dutch Perinatal database were validated ensuring good accuracy of our baseline and outcome variables. Furthermore, an extensive number of preconception features were available for analysis allowing for a comprehensive evaluation of obstetric and perinatal disease. To accomplish this systematic assessment multiple tests were required increasing the likelihood of a type I error. To mitigate this risk, the Holm-Bonferroni correction method was used

for two-sample comparisons. Finally, these results appear to be highly relevant. The value of the Rotterdam criteria to guide treatments for women with PCOS has recently been called into question (46). However, the present findings suggest that the Rotterdam criteria (chiefly hyperandrogenism and oligo-anovulation), in addition to having utility for predicting reproductive outcomes, appear to be useful for identifying risk of obstetric and perinatal disease (46).

Some limitations of the current study should also be mentioned. Recruitment was primarily of infertile women presenting with menstrual cycle irregularities and few women with regular cycles were included. Analyses of oligo-anovulation were thus restricted and our ability to draw conclusions regarding causality between this feature and perinatal outcomes was limited. Baseline variables and outcomes used for analyses were restricted to those already collected in our prospective cohort study or reliably available from the Dutch Perinatal registry. As such, we were unable to include analyses on pregnancy induced hypertension and gestational diabetes mellitus: two major obstetric complications in PCOS. Limited data were also available concerning paternal features, method of conception, or monitoring and interventions during pregnancy, which are known to impact obstetric outcomes and thus may have confounded observed results (47–50). Finally, of the 38% of women who did not have an identified pregnancy after screening the percentage of women who attempted to achieve pregnancy but were unsuccessful, had miscarriage, or terminated a pregnancy is not known as only live births were recorded in our data set. External validation is also required to ensure applicability of these results to populations outside of the Netherlands.

Taken together, the present analyses represent the largest assessments of a possible association between baseline characteristics in women with PCOS and major obstetric and perinatal complications. The current results suggest that primary disease characteristics of PCOS, chiefly hyperandrogenism and changes in blood glucose regulation, have relevance in predicting obstetric complications among PCOS women. Based on these findings it appears that women with PCOS and these features should be the focus of increased surveillance during pregnancy to help mitigate these women's and their children's increased risk of disease.

## Acknowledgments

**Financial Support:** J.P.C. has received funding from the Fulbright U.S. Student Association. M.N.G. has received funding from the Dutch Heart Foundation, grant number 2013T083. C.M. has received funding from the Dutch Heart Foundation, grant number 2013T083.

**Clinical Trial Information:** ClinicalTrials.gov no. NCT02309047 (registered 5 December 2014) and NCT00821379 (registered 13 January 2009).

**Correspondence and Reprint Requests:** Jacob P. Christ, MD, Department of Reproductive Medicine and Gynecology, University Medical Center Utrecht, HP F05.126, PO Box 85500, 3584 CX Utrecht, Netherlands. E-mail: [j.p.christ@umcutrecht.nl](mailto:j.p.christ@umcutrecht.nl).

**Disclosure Summary:** J.P.C. has received funding from the Fulbright U.S. Student Association. M.N.G. has received funding from the Dutch Heart Foundation, grant number 2013T083. C.M. has received funding from the Dutch Heart Foundation, grant number 2013T083. G.J.B. has received grant support from (in alphabetical order) the Dutch maternity care service organizations through the AWKG initiative, Dutch Medical Research Council (ZonMW), and the EuroQol Foundation. J.S.E.L. has received fees or grant support in the most recent 5-year period from the following organizations (in alphabetic order): Dutch Heart Foundation, Dutch Medical Research Counsel (ZonMW), Euroscreen/Ogeda, Ferring, Netherlands Genomic Initiative (NGI), Roche Diagnostics, Danone and Titus Healthcare. B.C.J.M.F. has received fees or grant support in the most recent 5-year period from the following organizations (in alphabetic order): Actavis/Watson/Uteron, Controversies in Obstetrics & Gynecology (COGI), Dutch Heart Foundation, Dutch Medical Research Counsel (ZonMW), Euroscreen/Ogeda, Ferring, London Womens Clinic (LWC), Merck Serono (GFI), Myovant, Netherlands Genomic Initiative (NGI), OvaScience, Pantharei Bioscience, PregLem/Gedeon Richter/Finnox, Reproductive Biomedicine Online (RBMO), Roche, Teva, and World Health Organization (WHO). The remaining authors have nothing to disclose.

## References

1. Fauser BC, Tarlatzis BC, Rebar RW, Legro RS, Balen AH, Lobo R, Carmina E, Chang J, Yildiz BO, Laven JS, Boivin J, Petraglia F, Wijeyeratne CN, Norman RJ, Dunaif A, Franks S, Wild RA, Dumesic D, Barnhart K. Consensus on women's health aspects of polycystic ovary syndrome (PCOS): the Amsterdam ESHRE/ASRM-Sponsored 3rd PCOS Consensus Workshop Group. *Fertil Steril*. 2012;97(1):28–38.e25.
2. Rotterdam ESHRE/ASRM-Sponsored PCOS Consensus Workshop Group. Revised 2003 consensus on diagnostic criteria and long-term health risks related to polycystic ovary syndrome. *Fertil Steril*. 2004;81(1):19–25.
3. Rotterdam ESHRE/ASRM-Sponsored PCOS consensus workshop group. Revised 2003 consensus on diagnostic criteria and long-term health risks related to polycystic ovary syndrome (PCOS). *Hum Reprod*. 2004;19(1):41–47.
4. Moran LJ, Misso ML, Wild RA, Norman RJ. Impaired glucose tolerance, type 2 diabetes and metabolic syndrome in polycystic ovary syndrome: a systematic review and meta-analysis. *Hum Reprod Update*. 2010;16(4):347–363.
5. Wild RA, Rizzo M, Clifton S, Carmina E. Lipid levels in polycystic ovary syndrome: Systematic review and meta-analysis. *Fertil Steril*. 2011;95(3):1073–9.e1–1073–9.e11.
6. Diamanti-Kandarakis E, Dunaif A. Insulin resistance and the polycystic ovary syndrome revisited: an update on mechanisms and implications. *Endocr Rev*. 2012;33(6):981–1030.
7. Moran LJ, Norman RJ, Teede HJ. Metabolic risk in PCOS: phenotype and adiposity impact. *Trends Endocrinol Metab*. 2015;26(3):136–143.

8. Palomba S, de Wilde MA, Falbo A, Koster MP, La Sala GB, Fauser BC. Pregnancy complications in women with polycystic ovary syndrome. *Hum Reprod Update*. 2015;**21**(5):575–592.
9. Boomsma CM, Eijkemans MJ, Hughes EG, Visser GH, Fauser BC, Macklon NS. A meta-analysis of pregnancy outcomes in women with polycystic ovary syndrome. *Hum Reprod Update*. 2006;**12**(6):673–683.
10. Kjerulff LE, Sanchez-Ramos L, Duffy D. Pregnancy outcomes in women with polycystic ovary syndrome: a metaanalysis. *Am J Obstet Gynecol*. 2011;**204**(6):558.e1–558.e6.
11. Doherty DA, Newnham JP, Bower C, Hart R. Implications of polycystic ovary syndrome for pregnancy and for the health of offspring. *Obstet Gynecol*. 2015;**125**(6):1397–1406.
12. Yu HF, Chen HS, Rao DP, Gong J. Association between polycystic ovary syndrome and the risk of pregnancy complications: a PRISMA-compliant systematic review and meta-analysis. *Medicine (Baltimore)*. 2016;**95**(51):e4863.
13. Han AR, Kim HO, Cha SW, Park CW, Kim JY, Yang KM, Song IO, Koong MK, Kang IS. Adverse pregnancy outcomes with assisted reproductive technology in non-obese women with polycystic ovary syndrome: a case-control study. *Clin Exp Reprod Med*. 2011;**38**(2):103–108.
14. Roos N, Kieler H, Sahlin L, Ekman-Ordeberg G, Falconer H, Stephansson O. Risk of adverse pregnancy outcomes in women with polycystic ovary syndrome: population based cohort study. *BMJ*. 2011;**343**:d6309.
15. Naver KV, Grinstead J, Larsen SO, Hedley PL, Jørgensen FS, Christiansen M, Nilas L. Increased risk of preterm delivery and pre-eclampsia in women with polycystic ovary syndrome and hyperandrogenaemia. *BJOG*. 2014;**121**(5):575–581.
16. Qin JZ, Pang LH, Li MJ, Fan XJ, Huang RD, Chen HY. Obstetric complications in women with polycystic ovary syndrome: a systematic review and meta-analysis. *Reprod Biol Endocrinol*. 2013;**11**:56.
17. Palomba S, Falbo A, Russo T, Tolino A, Orio F, Zullo F. Pregnancy in women with polycystic ovary syndrome: the effect of different phenotypes and features on obstetric and neonatal outcomes. *Fertil Steril*. 2010;**94**(5):1805–1811.
18. Barker DJ, Osmond C, Golding J, Kuh D, Wadsworth ME. Growth in utero, blood pressure in childhood and adult life, and mortality from cardiovascular disease. *BMJ*. 1989;**298**(6673):564–567.
19. Kermack AJ, Van Rijn BB, Houghton FD, Calder PC, Cameron IT, Macklon NS. The ‘Developmental Origins’ Hypothesis: relevance to the obstetrician and gynecologist. *J Dev Orig Health Dis*. 2015;**6**(5):415–424.
20. de Wilde MA, Veltman-Verhulst SM, Goverde AJ, Lambalk CB, Laven JS, Franx A, Koster MP, Eijkemans MJ, Fauser BC. Pre-conception predictors of gestational diabetes: a multicentre prospective cohort study on the predominant complication of pregnancy in polycystic ovary syndrome. *Hum Reprod*. 2014;**29**(6):1327–1336.
21. Palomba S, Falbo A, Chiossi G, Muscogiuri G, Fornaciari E, Orio F, Tolino A, Colao A, La Sala GB, Zullo F. Lipid profile in non-obese pregnant women with polycystic ovary syndrome: a prospective controlled clinical study. *Steroids*. 2014;**88**:36–43.
22. Palomba S, Falbo A, Chiossi G, Orio F, Tolino A, Colao A, La Sala GB, Zullo F. Low-grade chronic inflammation in pregnant women with polycystic ovary syndrome: a prospective controlled clinical study. *J Clin Endocrinol Metab*. 2014;**99**(8):2942–2951.
23. de Wilde MA, Lamain-de Ruiter M, Veltman-Verhulst SM, Kwee A, Laven JS, Lambalk CB, Eijkemans MJ, Franx A, Fauser BCJM, Koster MPH. Increased rates of complications in singleton pregnancies of women previously diagnosed with polycystic ovary syndrome predominantly in the hyperandrogenic phenotype. *Fertil Steril*. 2017;**108**(2):333–340.
24. Méray N, Reitsma JB, Ravelli AC, Bonsel GJ. Probabilistic record linkage is a valid and transparent tool to combine databases without a patient identification number. *J Clin Epidemiol*. 2007;**60**(9):883–891.
25. Daan NM, Louwers YV, Koster MP, Eijkemans MJ, de Rijke YB, Lentjes EW, Fauser BC, Laven JS. Cardiovascular and metabolic profiles amongst different polycystic ovary syndrome phenotypes: who is really at risk? *Fertil Steril*. 2014;**102**(5):1444–1451.e3.
26. Broekmans FJ, Knauff EA, Valkenburg O, Laven JS, Eijkemans MJ, Fauser BC. PCOS according to the Rotterdam consensus criteria: change in prevalence among WHO-II anovulation and association with metabolic factors. *BJOG*. 2006;**113**(10):1210–1217.
27. Goverde AJ, van Koert AJ, Eijkemans MJ, Knauff EA, Westerveld HE, Fauser BC, Broekmans FJ. Indicators for metabolic disturbances in anovulatory women with polycystic ovary syndrome diagnosed according to the Rotterdam consensus criteria. *Hum Reprod*. 2009;**24**(3):710–717.
28. Tranquilli AL. Introduction to ISSHP new classification of pre-eclampsia. *Pregnancy Hypertens*. 2013;**3**(2):58–59.
29. Visser GH, Eilers PH, Elferink-Stinkens PM, Merkus HM, Wit JM. New Dutch reference curves for birthweight by gestational age. *Early Hum Dev*. 2009;**85**(12):737–744.
30. Holm S. A simple sequentially rejective multiple test procedure. *Scand J Stat*. 1979;**6**(2):65–70.
31. Janvier A, Spelke B, Barrington KJ. The epidemic of multiple gestations and neonatal intensive care unit use: the cost of irresponsibility. *J Pediatr*. 2011;**159**(3):409–413.
32. McClamrock HD, Jones HW Jr, Adashi EY. Ovarian stimulation and intrauterine insemination at the quarter centennial: implications for the multiple births epidemic. *Fertil Steril*. 2012;**97**(4):802–809.
33. Sunderam S, Kissin DM, Crawford SB, Folger SG, Boulet SL, Warner L, Barfield WD. Assisted reproductive technology surveillance - United States, 2015. *MMWR Surveill Summ*. 2018;**67**(3):1–28.
34. Koster MP, de Wilde MA, Veltman-Verhulst SM, Houben ML, Nikkels PG, van Rijn BB, Fauser BC. Placental characteristics in women with polycystic ovary syndrome. *Hum Reprod*. 2015;**30**(12):2829–2837.
35. Palomba S, Russo T, Falbo A, Di Cello A, Amendola G, Mazza R, Tolino A, Zullo F, Tucci L, La Sala GB. Decidual endovascular trophoblast invasion in women with polycystic ovary syndrome: an experimental case-control study. *J Clin Endocrinol Metab*. 2012;**97**(7):2441–2449.
36. Sun M, Maliqueo M, Benrick A, Johansson J, Shao R, Hou L, Jansson T, Wu X, Stener-Victorin E. Maternal androgen excess reduces placental and fetal weights, increases placental steroidogenesis, and leads to long-term health effects in their female offspring. *Am J Physiol Endocrinol Metab*. 2012;**303**(11):E1373–E1385.
37. Palomba S, Russo T, Falbo A, Di Cello A, Tolino A, Tucci L, La Sala GB, Zullo F. Macroscopic and microscopic findings of the placenta in women with polycystic ovary syndrome. *Hum Reprod*. 2013;**28**(10):2838–2847.
38. Palomba S, Falbo A, Chiossi G, Tolino A, Tucci L, La Sala GB, Zullo F. Early trophoblast invasion and placentation in women with different PCOS phenotypes. *Reprod Biomed Online*. 2014;**29**(3):370–381.
39. Seely EW, Solomon CG. Insulin resistance and its potential role in pregnancy-induced hypertension. *J Clin Endocrinol Metab*. 2003;**88**(6):2393–2398.
40. Falbo A, Rocca M, Russo T, D’Ettore A, Tolino A, Zullo F, Orio F, Palomba S. Changes in androgens and insulin sensitivity indexes throughout pregnancy in women with polycystic ovary syndrome (PCOS): relationships with adverse outcomes. *J Ovarian Res*. 2010;**3**:23.
41. Goyal NK, Hall ES, Greenberg JM, Kelly EA. Risk prediction for adverse pregnancy outcomes in a Medicaid population. *J Womens Health (Larchmt)*. 2015;**24**(8):681–688.
42. European Commission. European core health indicators. Available at: [https://ec.europa.eu/health/indicators\\_data/indicators\\_en](https://ec.europa.eu/health/indicators_data/indicators_en). Accessed 27 December 2018.

43. Xia H, Zhang R, Sun X, Wang L, Zhang W. Risk factors for preeclampsia in infertile Chinese women with polycystic ovary syndrome: a prospective cohort study. *J Clin Hypertens (Greenwich)*. 2017;**19**(5):504–509.
44. Mumm H, Jensen DM, Sørensen JA, Andersen LL, Ravn P, Andersen M, Glintborg D. Hyperandrogenism and phenotypes of polycystic ovary syndrome are not associated with differences in obstetric outcomes. *Acta Obstet Gynecol Scand*. 2015;**94**(2):204–211.
45. Joham AE, Teede HJ, Ranasinha S, Zoungas S, Boyle J. Prevalence of infertility and use of fertility treatment in women with polycystic ovary syndrome: data from a large community-based cohort study. *J Womens Health (Larchmt)*. 2015;**24**(4):299–307.
46. Wang R, Mol BW. The Rotterdam criteria for polycystic ovary syndrome: evidence-based criteria? *Hum Reprod*. 2017;**32**(2):261–264.
47. Roberge S, Nicolaides K, Demers S, Hyett J, Chaillet N, Bujold E. The role of aspirin dose on the prevention of preeclampsia and fetal growth restriction: systematic review and meta-analysis. *Am J Obstet Gynecol*. 2017;**216**(2):110–120.e6.
48. Shepherd E, Gomersall JC, Tieu J, Han S, Crowther CA, Middleton P. Combined diet and exercise interventions for preventing gestational diabetes mellitus. *Cochrane Database Syst Rev*. 2017;**11**:CD010443.
49. Storgaard M, Loft A, Bergh C, Wennerholm UB, Söderström-Anttila V, Romundstad LB, Aittomäki K, Oldereid N, Forman J, Pinborg A. Obstetric and neonatal complications in pregnancies conceived after oocyte donation: a systematic review and meta-analysis. *BJOG*. 2017;**124**(4):561–572.
50. Soubry A. POHaD: why we should study future fathers. *Environ Epigenet*. 2018;**4**(2):dvy007.
